# Supplementary material for: Rationalisation of Antifungal Properties of α-Helical Pore-Forming Peptide, Mastoparan B
Source: MDPI journal article supplement (doi:10.3390/molecules27041438), 2022-02-21
Supplement: s1 [file s1]

Figure S1

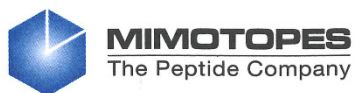

## ANALYTICAL DATA

Product Name 2948301  
 Lot No P2948301-JQ109385  
 Column 4.6mm\*250mm, Boston Green ODS-AQ  
 Solvent A 0.1% trifluoroacetic in 100% acetonitrile  
 Solvent B 0.1% trifluoroacetic in 100% water  
 Gradient  
     A B  
     0.01min 32% 68%  
     25min 57% 43%  
     25.1min 100% 0%  
     30.0min STOP  
 Flow rate 1.0ml/min  
 Wavelength 220nm  
 Volume 5ul

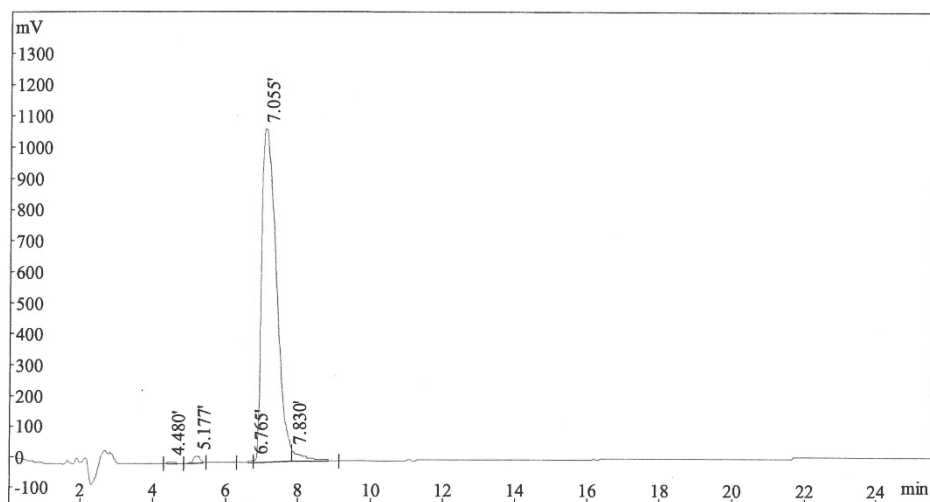

| Rank  | Time  | Conc.   | Area     | Height  |
|-------|-------|---------|----------|---------|
| 1     | 4.480 | 0.1947  | 58620    | 5322    |
| 2     | 5.177 | 0.8218  | 247420   | 24788   |
| 3     | 6.765 | 0.09007 | 27117    | 3961    |
| 4     | 7.055 | 96.46   | 29040982 | 1075924 |
| 5     | 7.830 | 2.433   | 732545   | 35608   |
| Total |       | 100     | 30106684 | 1145603 |

Figure S1. RP-HPLC of MB.

**Figure S2**

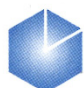

**MIMOTOPES**  
The Peptide Company

**ANALYTICAL DATA**

Product Name 2760501  
Lot No P2760501-JQ202409  
Column 4.6×250mm,Venusil MP C18-5  
Solvent A 0.1% trifluoroacetic in 100% acetonitrile  
Solvent B 0.1% trifluoroacetic in 100% water  
Gradient  
0.01min A B  
0.01min 10% 90%  
25min 67% 33%  
25.1min 100% 0%  
30min STOP  
Flow rate 1.0 mL/min  
Wavelength 214nm  
Volume 5ul

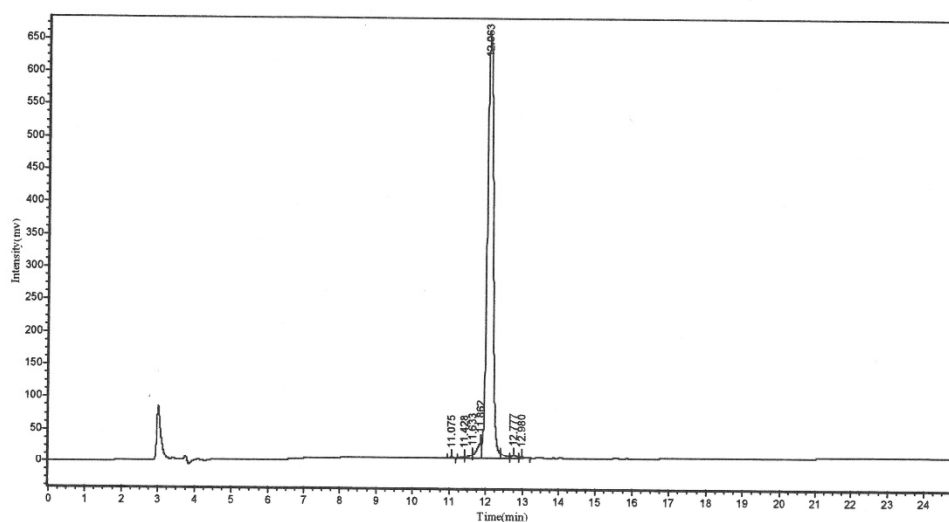

| Peak No. | Ret Time | Height     | Area        | Conc.    |
|----------|----------|------------|-------------|----------|
| 1        | 11.075   | 940.581    | 6042.699    | 0.0757   |
| 2        | 11.428   | 1039.995   | 8135.851    | 0.1019   |
| 3        | 11.633   | 4490.330   | 31790.559   | 0.3982   |
| 4        | 11.862   | 23532.131  | 217288.359  | 2.7219   |
| 5        | 12.063   | 644091.188 | 7606070.500 | 95.2786  |
| 6        | 12.063   | 8115.689   | 61754.988   | 0.7736   |
| 7        | 12.777   | 3746.849   | 35188.813   | 0.4408   |
| 8        | 12.980   | 1804.731   | 16704.756   | 0.2093   |
| Total    |          |            |             | 100.0000 |

**Figure S2.** RP-HPLC of MG.

**Figure S3**

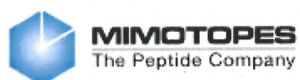

**ANALYTICAL DATA**

Product Name 3223601  
 Lot No P3223601-JQ817328  
 Column 4.6×250mm, Kromasil 100-5C18  
 Solvent A 0.1% trifluoroacetic in 100% acetonitrile  
 Solvent B 0.1% trifluoroacetic in 100% water  
 Gradient

|         | A    | B   |
|---------|------|-----|
| 0.01min | 30%  | 70% |
| 25min   | 97%  | 3%  |
| 25.1min | 100% | 0%  |
| 30min   | STOP |     |

Flow rate 1.0 mL/min  
 Wavelength 214nm  
 Volume 5ul

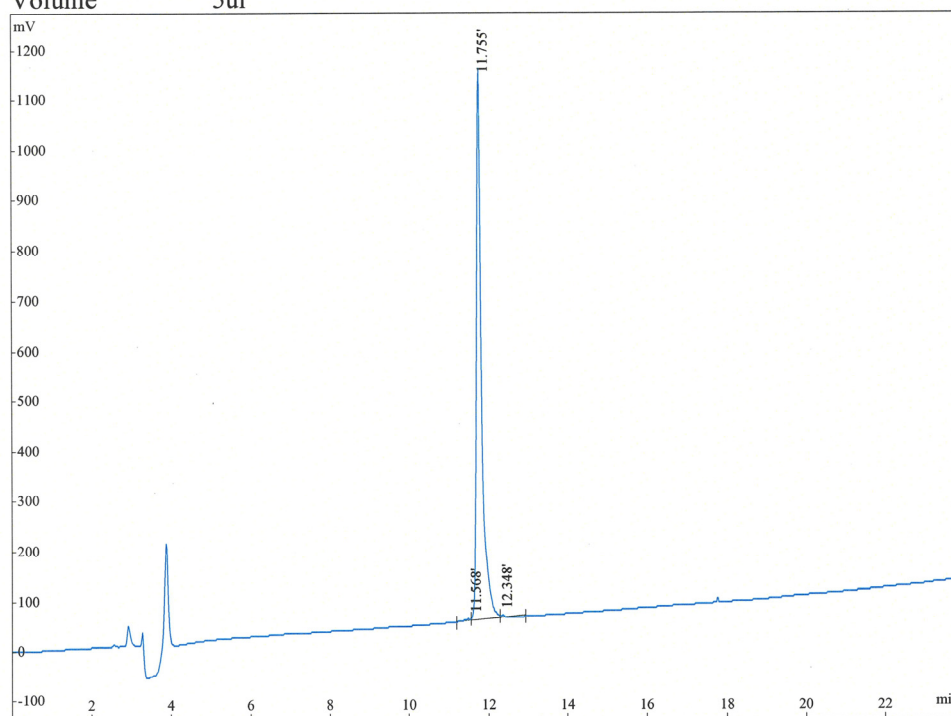

| Rank  | Time   | Conc.  | Area    | Height  |
|-------|--------|--------|---------|---------|
| 1     | 11.568 | 0.5424 | 52801   | 4860    |
| 2     | 11.755 | 98.76  | 9613368 | 1112304 |
| 3     | 12.348 | 0.6992 | 68062   | 6637    |
| Total |        | 100    | 9734231 | 1123801 |

**Figure S3.** RP-HPLC of ML.

Figure S4

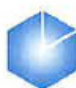

**MIMOTOPES**  
The Peptide Company

## ANALYTICAL DATA

Product Name 2760503  
Lot No P2760503-JQ061318  
Column 4.6×250mm, Venusil MP C18-5  
Solvent A 0.1% trifluoroacetic in 100% acetonitrile  
Solvent B 0.1% trifluoroacetic in 100% water  
Gradient  
0.01min A 10% B 90%  
25.00min 67% 33%  
25.10min 100% 0%  
30.0min STOP  
Flow rate 1.0ml/min  
Wavelength 214nm  
Volume 5ul

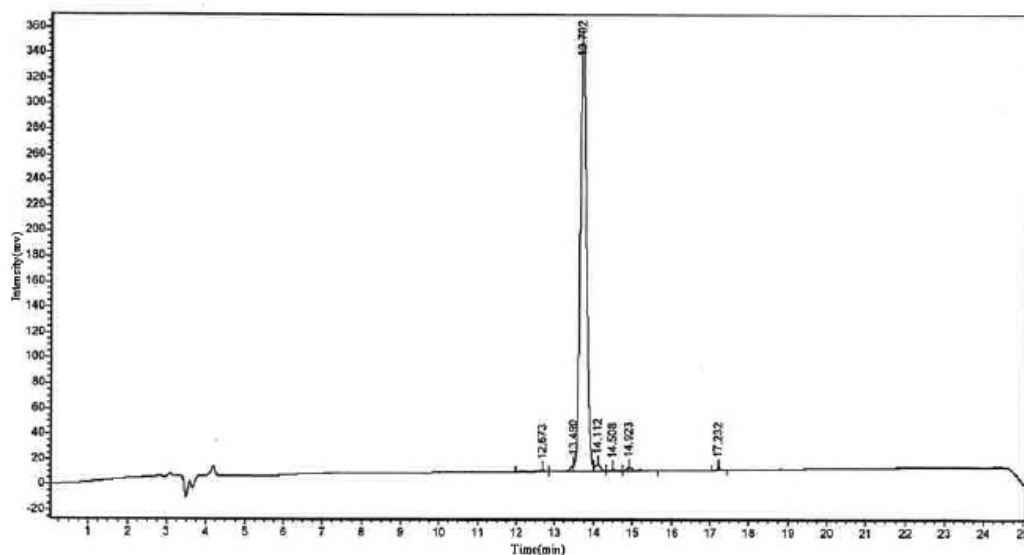

| Peak No. | Ret Time | Height     | Area        | Conc    |
|----------|----------|------------|-------------|---------|
| 1        | 12.673   | 1057.620   | 12636.098   | 0.3175  |
| 2        | 13.490   | 4214.763   | 34913.258   | 0.8773  |
| 3        | 13.702   | 340328.813 | 3828297.750 | 96.2015 |
| 4        | 14.112   | 4626.406   | 48164.012   | 1.2103  |
| 5        | 14.508   | 1152.984   | 12833.023   | 0.3225  |
| 6        | 14.923   | 2408.923   | 33715.977   | 0.8473  |
| 7        | 17.232   | 1045.157   | 8896.015    | 0.2235  |
| Total    |          |            |             | 100.000 |

Figure S4. RP-HPLC of CA.

**Figure S5**

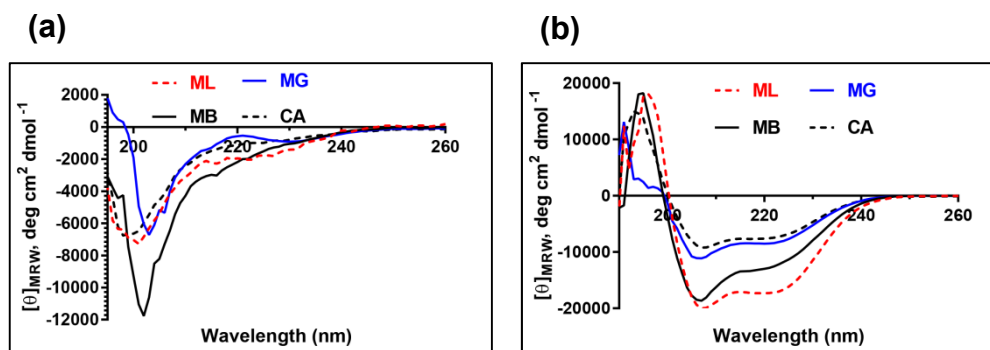

**Figure S5.** CD spectra of poreforming peptides in (a) PBS and in (b) 30% TFE. The peptide concentration was 200  $\mu$ M.
