# Supplementary material for: Rationalisation of Antifungal Properties of α-Helical Pore-Forming Peptide, Mastoparan B
Source: Molecules. 2022 Feb 21;27(4):1438. doi: 10.3390/molecules27041438 (PMC8879275; doi:10.3390/molecules27041438)
Supplement: Supplementary file 1 [file molecules-27-01438-s001.zip › molecules-1497164-Table S1.xlsx]

## Sheet: C glabrata
Peptide sequence	Number of residues	H	mH	Q	mH*Q	H*Q	MIC (mM)	log10(MIC)	References
LKLKSIVSWAKKVL-NH2	14	0.561	0.404	5	2.02	2.805	6.79429	-5.16786
ILGTILGLLKSL-NH2	12	0.944	0.685	2	1.37	1.888	16	-4.79588	International Journal of Peptide Research and Therapeutics (2021) 27:851–862
ILGTILGLLRSL-NH2	12	0.942	0.686	2	1.372	1.884	16	-4.79588
ILGTILGLLHSL-NH2	12	1.037	0.618	1	0.618	1.037	32	-4.49485
IDWKKLLDAAKQIL	14	0.489	0.511	2	1.022	0.978	8	-5.09691	Peptides 2014;56:22-29.
ILPWKWPWWPWRR	13	1.069	0.19	3	0.57	3.207	52.4	-4.28067	J Antimicrob Chemother. 2006;58:950-9.
FIGMIPGLIGGLISAFK-NH2	17	0.906	0.597	1	0.597	0.906	800	-3.09691	Front Microbiol 2016;7:1844
FIGMIPGLIGGLISAIK-NH2	17	0.907	0.597	1	0.597	0.907	800	-3.09691
FLGMIPGLIGGLISAFK-NH2	17	0.908	0.594	1	0.594	0.908	800	-3.09691
ILSAIWSGIKSLF-NH2	13	0.926	0.668	1	0.668	0.926	800	-3.09691
GILGKIWEGVKSLI	14	0.686	0.68	1	0.68	0.686	800	-3.09691
FWSTLLSIGKSLL-NH2	13	0.907	0.584	2	1.168	1.814	12.5	-4.90309	Peptides. 2021;141:170553.
FWSTIWNAAKSLI-NH2	13	0.831	0.639	2	1.278	1.662	25	-4.60206
FLQGIIDTVGKWL-NH2	13	0.811	0.751	1	0.751	0.811	400	-3.39794
FLQGIWDTVGKWL-NH2	13	0.845	0.762	1	0.762	0.845	200	-3.69897
FLSKIWDGVKSLL-NH2	13	0.718	0.738	2	1.476	1.436	50	-4.30103
LWGALLGLGSTLLSKL	16	0.853	0.531	2	1.062	1.706	100	-4
KWRRWVRWI	9	0.639	0.894	4	3.576	2.556	9.2	-5.03621	FEMS Yeast Res. 2009;9:967-70.
KKVVFKVKFKK-NH2	11	0.118	0.034	7	0.238	0.826	14.5	-4.83863	Bioorg Med Chem. 1999;7:2509-15.
AKRHHGYKRKFH	12	-0.128	0.343	5	1.715	-0.64	15.98	-4.79642	Journal of Antimicrobial Chemotherapy (2004) 53, 750–758
RKSYKCLHKRCR	12	-0.014	0.537	6	3.222	-0.084	15.8	-4.80134
FKCRRWQWRM-NH2	10	0.482	0.218	5	1.09	2.41	48.7	-4.31247
ERILSILRHQNLLKE	15	0.359	0.229	1	0.229	0.359	110	-3.95861	Interdiscip Sci. 2016;8:319-26.
ALQGAKERAHQQ	12	-0.045	0.223	1	0.223	-0.045	260	-3.58503
RILSILRHQ	9	0.539	0.52	2	1.04	1.078	440.7	-3.35586	Biochem J. 2019;476:483-497.
FFSLIPSLVGGLISAFK-NH2	17	0.895	0.571	2	1.142	1.79	69.5	-4.15802	Peptides. 2015;68:3-10.
FFSLIPKLVKGLISAFK	17	0.781	0.669	3	2.007	2.343	18.8	-4.72584	Toxins (Basel). 2018;10:161.
FFKLIPKLVKGLISAFK	17	0.725	0.723	4	2.892	2.9	9.4	-5.02687
FFSLIPSLVKKLIKAFK-NH2	17	0.722	0.7	5	3.5	3.61	9.4	-5.02687	Int J Mol Sci. 2019, 20, 623
FFKLIPKLVKKLIKAFK-NH2	17	0.611	0.805	7	5.635	4.277	4.7	-5.3279
INWIKIGKKIIASL-NH2	14	0.689	0.55	4	2.2	2.756	20	-4.69897	Peptide Sci. 2020;112:e24141
RSMRLSFRARGYGFR	15	0.177	0.225	5	1.125	0.885	30	-4.52288	Cell Mol Life Sci. 2005;62:377–385
IDWHHLLDAAHQIL-NH2	14	0.729	0.403	2	0.806	1.458	32	-4.49485	Acta Biochim Biophys Sin. 2020; 52: 603–611
KKVVFKVKFKK-NH2	11	0.118	0.034	7	0.238	0.826	23.2	-4.63451	Bioorg Med Chem. 1999;7:2509-15.
FLPIVGRLISGIL	13	1.014	0.588	1	0.588	1.014	100	-4	Peptides. 2018;106:9-20.
SILPTIVSFLSKVF	14	0.921	0.574	1	0.574	0.921	12.5	-4.90309
FLPFLKSILGKIL	13	0.975	0.605	2	1.21	1.95	12.5	-4.90309
FLSAITSILGKFF	13	0.913	0.686	1	0.686	0.913	25	-4.60206
FLPLLASLFSRLF	13	1.062	0.589	1	0.589	1.062	25	-4.60206
IPPFIKKVLTTVF	13	0.869	0.525	2	1.05	1.738	12.5	-4.90309	Cent Eur J Biol. 2011;6:150-159
GMWKKILGHLIR-NH2	12	0.635	0.695	3	2.085	1.905	30	-4.52288
GMWKKIKGKLIR-NH2	12	0.318	0.582	6	3.492	1.908	70	-4.1549
