# Supplementary material for: Rationalisation of Antifungal Properties of α-Helical Pore-Forming Peptide, Mastoparan B
Source: Molecules. 2022 Feb 21;27(4):1438. doi: 10.3390/molecules27041438 (PMC8879275; doi:10.3390/molecules27041438)
Supplement: Supplementary file 1 [file molecules-27-01438-s001.zip › molecules-1497164-Table S2.xlsx]

## Sheet: C. tropicalis
Peptide Sequence	Number of amino acid residues	H	mH	Q	mH*Q	H*Q	MIC (mM)	log10(MIC)	References
LKLKSIVSWAKKVL-NH2	14	0.561	0.404	5	2.02	2.805	0.744	-6.12843	This report
RPLNFKMLRFWGQNR	15	0.383	0.221	5	1.105	1.915	6.25	-5.20412	Int J Mol Sci 2021;22:3666
KKKKKKAAFAAWAAFAA-NH2	17	0.139	0.139	7	0.973	0.973	59.3	-4.22695	J Antimicrob Chemother. 2006 May;57(5):899-907.
KAFKKWAKFAAKAAKAAA-NH2	18	0.149	0.533	7	3.731	1.043	44.04	-4.35615
KKKKKKAAWAAWAAWAA-NH2	17	0.194	0.189	7	1.323	1.358	39.12	-4.4076
KKKKKKAWWAAWAAWWA-NH2	17	0.422	0.36	7	2.52	2.954	23.9	-4.6216
ILGTILGLLKSL-NH2	12	0.944	0.685	2	1.37	1.888	4	-5.39794	Int J Pept Res Ther 2021;27, 851–862
ILGTILGLLRSL-NH2	12	0.942	0.686	2	1.372	1.884	4	-5.39794
ILGTILGLLHSL-NH2	12	1.037	0.618	1	0.618	1.037	8	-5.09691
ILPWKWPWWPWRR	13	1.069	0.19	3	0.57	3.207	26.2	-4.5817	J Antimicrob Chemother. 2006;58:950-9.
FIGMIPGLIGGLISAFK-NH2	17	0.906	0.597	1	0.597	0.906	12.5	-4.90309	Front Microbiol 2016;7:1844
FIGMIPGLIGGLISAIK-NH2	17	0.907	0.597	1	0.597	0.907	12.5	-4.90309
FLGMIPGLIGGLISAFK-NH2	17	0.908	0.594	1	0.594	0.908	6.25	-5.20412
ILSAIWSGIKSLF-NH2	13	0.926	0.668	1	0.668	0.926	25	-4.60206
GILGKIWEGVKSLI	14	0.686	0.68	1	0.68	0.686	25	-4.60206
ILRWPWWPWRRK	12	0.827	0.29	5	1.45	4.135	17.98	-4.74521	Antimicrob Agents Chemother. 2008;52:1187-1189
KWRRWVRWI	9	0.639	0.894	4	3.576	2.556	4.6	-5.33724	FEMS Yeast Res. 2009;9:967-70.
KKVVFKVKFKK-NH2	11	0.118	0.034	7	0.238	0.826	1.82	-5.73993	Bioorg Med Chem. 1999;7(11):2509-15.
AEFGIKQRVWY	11	0.497	0.167	1	0.167	0.497	22.91	-4.63997	Peptides. 2011;32:1741-7.
IIIQYEGHKH	10	0.477	0.091	0	0	0	16.5	-4.78252	Results Immunol. 2012 Apr 2;2:66-71.
ILGTILGLLKGL-NH2	12	0.947	0.683	2	1.366	1.894	8	-5.09691	J Pept Sci. 2017 May;23(5):392-402.
VNWKKILGKIIKVVK-NH2	15	0.497	0.657	6	3.942	2.982	0.8	-6.09691	FEMS Yeast Res. 2019 May 1;19(3):foz013.
GKWMSLLKHILK-NH2	12	0.625	0.695	4	2.78	2.5	1.6	-5.79588
GMWKKILGHLIR-NH2	12	0.635	0.695	4	2.78	2.54	13	-4.88606
GMWKKIKGKLIR-NH2	12	0.318	0.582	6	3.492	1.908	20	-4.69897
FKCRRWQWRM-NH2	10	0.482	0.218	5	1.09	2.41	48.7	-4.31247
MFKCRRWQWRMKKLG-NH2	15	0.385	0.258	7	1.806	2.695	48.7	-4.31247
ERILSILRHQNLLKE	15	0.359	0.229	1	0.229	0.359	73	-4.13668	Interdiscip Sci. 2016 Sep;8(3):319-26.
ALQGAKERAHQQ	15	-0.045	0.223	1	0.223	-0.045	75	-4.12494
RILSILRHQ	9	0.539	0.52	2	1.04	1.078	3.44	-5.46344	Biochem J. 2019 Feb 5;476(3):483-497.
FLPIVGRLISGIL	13	1.014	0.588	1	0.588	1.014	6.25	-5.20412
SILPTIVSFLSKVF	14	0.921	0.574	1	0.574	0.921	3.1	-5.50864	Peptides. 2018;106:9-20.
FLPFLKSILGKIL	13	0.975	0.605	2	1.21	1.95	1.6	-5.79588
FLSAITSILGKFF	13	0.913	0.686	1	0.686	0.913	6.2	-5.20761
FLPLLASLFSRLF	13	1.062	0.589	1	0.589	1.062	1.6	-5.79588
IPPFIKKVLTTVF	13	0.869	0.525	2	1.05	1.738	3.1	-5.50864
KKLLPIVKNLLKSLL	15	0.623	0.628	4	2.512	2.492	1.8	-5.74473	J Fungi (Basel). 2021 Jun 7;7(6):457.
KIGKVLLVKGIK-NH2	12	0.457	0.225	5	1.125	2.285	16	-4.79588	Front Microbiol. 2020 Sep 30;11:548620.
KIGKVLLVKGIKKIGKVL-NH2	18	0.457	0.397	7	2.779	3.199	8	-5.09691
RIGRVLLVRGIRRIGRVL-NH2	18	0.45	0.401	7	2.807	3.15	8	-5.09691
KIGKFLLFKGIKKIGKFL-NH2	18	0.552	0.366	7	2.562	3.864	2	-5.69897
RIGRFLLFRGIRRIGRFL-NH2	18	0.545	0.369	7	2.583	3.815	8	-5.09691
RIGRWLLWRGIRRIGRWL-NH2	18	0.622	0.344	7	2.408	4.354	2	-5.69897
